# Supplementary material for: Synthesis and biological evaluation of new inhibitors of UDP-Galf transferase—a key enzyme in M. tuberculosis cell wall biosynthesis
Source: Royal Society of Chemistry journal article supplement (doi:10.1039/b411554f), 2004-01-01
Supplement: b411554f.doc [file b411554f.doc]

# Supplementary data

Synthesis and biological evaluation of new inhibitors of UDP-Gal*f* transferase - a key enzyme in *M. tuberculosis* cell wall biosynthesis

Sylvaine Cren,*a* Sudagar S. Gurcha,*b* Alexander J. Blake,*a* Gurdyal S. Besra,*b* Neil R. Thomas**a*

a School of Chemistry, Centre for Biomolecular Sciences, University of Nottingham, University Park, Nottingham, UK NG7 2RD. E-mail: neil.thomas@nottingham.ac.uk

b School of Biosciences, University of Birmingham, Birmingham, UK B15 2TT.

**Instrumentation**

1H NMR spectra were recorded on a Bruker AM400 spectrometer instrument at 400 MHz. 13C NMR were recorded on either a Brucker AM400 spectrmeter at 100 MHz, or a Bruker AM500 spectrometer at 125 MHz. Chemical shifts are reported in parts per million using the residual protic solvent as an internal standard (7.27 ppm for 1H and 77.1 ppm for 13C in CDCl3, 4.70 ppm for 1H in D2O). Mass spectra were recorded on a VG LCT instrument operating in positive electrospray mode (ESI+) or a VG Micromass 70E (chemical ionisation, CI+). IR analyses were conducted on a Perkin Elmer 1600 series spectrophotometer. Elemental analyses were conducted on an Exeter Analytical Iinc. CE-440 elemental analyser and melting points were determined using a Stuart Scientific SMP3 melting point apparatus and are uncorrected.

()-(3S,4R)-N-tert-Butoxycarbonyl-4-vinylpyrrolidin-3-ol (16)1

Pale yellow oil; mixture of rotamers; 1H NMR (400 MHz, CDCl3) 5.68 (ddd, *J* = 17.5, 10.3, 7.7 Hz, 1 H), 5.16 (d, *J* = 17.4 Hz, 1 H), 5.10 (d, *J* = 10.5 Hz, 1 H), 4.05 (q, *J* = 5.6 Hz, 1 H), 3.55-3.65 (m, 2 H), 3.30 (bs, 1 H), 3.10-3.25 (m, 2 H), 2.67 (quintet, *J* = 5.6 Hz, 1 H), 1.43 (s, 9 H). 13C NMR (125 MHz, CDCl3, 333 K) 154.6 (C), 136.5 (CH), 116.8 (CH2), 79.5 (C), 74.7 (CH), 52.3 (CH2), 50.0 (CH2), 48.7 (CH), 28.5 (CH3). HRMS (CI, NH3) required for C11H20NO3 214.1443, found 214.1432. Anal. calc. for C11H19NO3 C, 61.95%; H, 8.98%; N, 6.57%; found C, 61.67%; H, 9.09%; N, 6.51%. IR (CHCl3) 3609, 3430b, 2900, 1682, 1367, 1093, 992, 908 cm-1.

()-(3S,4R)-N-tert-Butoxycarbonyl-4-[(4S)-2,2-dimethyl-1,3-dioxolan-4-yl] pyrrolidin-3-ol (17)

White crystals; mixture of rotamers; mp 89.9-91.5 C; 1H NMR (400 MHz, CDCl3, 313K) 4.11-4.20 (m, 2 H), 4.08 (dd, *J* = 8.0, 6.2 Hz, 1 H), 3.69-3.74 (m, 2 H), 3.64 (dd, *J* = 11.2, 8.1 Hz, 1 H), 3.29 (dd, *J* = 11.2, 7.6 Hz, 1 H), 3.21 (dd, *J* = 11.2, 5.9 Hz, 1 H), 3.27 (m, 1 H), 2.02 (bs, 1 H), 1.47 (s, 9 H), 1.41 (s, 3 H), 1.36 (s, 3 H). 13C NMR (125 MHz, CDCl3) 154.6 (C), 109.1, 109.0 (C), 79.8, 79.6 (C), 76.0, 75.2 (CH), 72.2, 71.7 (CH), 67.9, 67.5 (CH2), 53.0, 52.8 (CH2), 49.1, 47.9 (CH), 46.4, 45.4 (CH2), 28.5 (CH3), 26.6 (CH3), 25.5 (CH3). Anal. calc. for C14H25NO5 C, 58.52%; H, 8.77%; N, 4.87%; found C, 58.48%; H, 8.60%; N, 4.96%. HRMS (CI, CH4) required for C14H25NO5 287.1733, found 287.1732. IR (CHCl3) 3610, 2981, 1688, 1368, 1059 cm-1.

()-(3S,4R)-N-tert-Butoxycarbonyl-4-[(4R)-2,2-dimethyl-1,3-dioxolan-4-yl] pyrrolidin-3-ol (18)

Colourless oil; mixture of rotamers; 1H NMR (400 MHz, CDCl3, 313K) 4.34 (dd, *J* = 12.9, 6.5 Hz, 1 H), 4.06 (dd, *J* = 7.9, 6.1 Hz, 1 H), 4.00 (m, 1 H), 3.71 (m, 1 H), 3.65 (dd, *J* = 7.8, 6.3 Hz, 1 H), 3.54 (m, 1 H), 3.21 (m, 1 H), 2.99 (dd, *J* = 11.0, 7.9 Hz, 1 H), 2.60 (bs, 1 H), 2.19 (m, 1 H), 1.45 (s, 9 H), 1.44 (s, 3 H), 1.35 (s, 3 H). 13C NMR (100 MHz, CDCl3) 154.5, 154.3 (C), 109.6, 109.5 (C), 79.6 (C), 77.4, 77.1 (CH), 73.5, 72.6 (CH), 68.4, 68.2 (CH2), 52.1, 51.9 (CH2), 49.4, 48.9 (CH), 46.3, 45.8 (CH2), 28.4 (CH3), 26.7 (CH3), 25.4 (CH3). Anal. calc. for C14H25NO5 C, 58.52%; H, 8.77%; N, 4.87%; found C, 58.41%; H, 8.81%; N, 4.87%. HRMS (CI, CH4) required for C14H25NO5 287.1733, found 287.1730. IR (CHCl3) 3564, 2882, 1682, 1382, 1080 cm-1.

()-(3S,4R)-4-[(1S)-1,2-dihydroxyethyl]pyrrolidin-3-ol (10)

Yellow oil; 1H NMR (400 MHz, D2O) 4.52 (m, 1 H), 3.58-3.64 (m, 3 H), 3.50 (dd, *J* = 11.7, 6.7 Hz, 1 H), 3.36 (dd, *J* = 12.6, 5.4 Hz, 1 H), 3.19 (dd, *J* = 12.6, 2.8 Hz, 1 H), 3.10 (dd, *J* = 12.3, 6.9 Hz, 1 H), 2.34 (m, 1 H); 13C NMR (100 MHz, D2O)  71.1 (CH), 70.7 (CH), 64.2 (CH2), 52.6 (CH2), 48.2 (CH), 46.9 (CH2); HRMS (ESI) required for C6H14NO3 148.0974, found 148.0983.

()-(3S,4R)-4-[(1R)-1,2-dihydroxyethyl]pyrrolidin-3-ol (11)

Brown oil; 1H NMR (400 MHz, D2O)  4.36 (m, 1 H), 3.75 (m, 1 H), 3.57 (dd, *J* = 11.9, 4.2 Hz, 1 H), 3.43-3.51 (m, 2 H), 3.40 (dd, *J* = 12.5, 5.8 Hz, 1 H), 3.24 (dd, *J* = 12.2, 7.4 Hz, 1 H), 3.15 (dd, *J* = 12.5, 3.7 Hz, 1 H), 2.31 (m, 1 H); 13C NMR (100 MHz, D2O)  72.3 (CH), 70.7 (CH), 64.4 (CH2), 52.0 (CH2), 48.1 (CH), 45.2 (CH2); HRMS (ESI) required for C6H14NO3 148.0974, found 148.0966.

**Galactosyltransferase assay.**2 Compounds **10** or **11** at 8, 6, 4, 2 and 1 mM (stored as 20mM ethanol stocks) and 1.6 μL of -(1,5)-acceptor (0.4 mM, stored as 20 mM ethanol stock) were dried. The compounds were then re-suspended in buffer A (containing 50 mM MOPS (adjusted to pH 7.9 with KOH), 5 mM β-mercaptoethanol and 10 mM MgCl2), and 8 μL of 1% Igepal were added. The resulting mixture was sonicated for 10 min. To this were added ATP (1 mM, 5 μL), NADH (100 mM, 8 μL) and UDP-[U-14C]Gal (Amersham Pharmacia Biotech, 0.25 Ci, 10 μL), the cell wall fractions (200 g, freshly prepared from *M. smegmatis* PMV 261) and the membranes (500 g, freshly prepared from *M. smegmatis* PMV 261) in a final reaction volume of 80 L. The reaction mixtures were then incubated at 37 oC for 1 h. A CHCl3/CH3OH (1:1, 533 L) solution was added to the incubation tubes and the proteins were removed by centrifugation at 13,000 rpm. The supernatant was recovered, dried under a stream of air, re-suspended in C2H5OH/H2O (1:1, 700 L) and loaded onto a pre-equilibrated (C2H5OH/H2O (1:1)) 1 mL Supelco strong anion exchange (LC-SAX) cartridge which was washed with 3  700 L of ethanol. The eluate was dried and the resulting products partitioned between *n*-butanol saturated with water (3 mL) and water saturated with *n*-butanol (3 mL). After centrifugation at 4,000 rpm, the organic layer was recovered and the aqueous layer extracted with 3 mL of *n*-butanol saturated with water. The combined organic extracts were then washed with 3 mL of water saturated with *n*-butanol. The organic layer was dried under a stream of air and re-suspended in 1 mL of *n*-butanol saturated with water. The total cpm of radiolabeled material extractable into the *n*-butanol phase was measured by scintillation counting using 10 mL of EcoScintA (National Diagnostics, Atlanta, USA). These experiments were conducted in triplicate and averaged. The incorporation of [14C]Gal was compared with the counts present in control assays (incubation of the reaction components in the absence of potential inhibitors) and the data for **11** were analysed using the IC50 determination template present in *GraFit* 4.0 software.3

References

1 S. U. Hansen and M. Bols, *Acta Chem. Scand.*, 1998, **52**, 1214.

2 A. K. Pathak, V. Pathak, L. Seitz, J. A. Maddry, S. S. Gurcha, G. S. Besra, W. J. Suling and R. C. Reynolds, *Bioorg. Med. Chem.*, 2001, **9**, 3129.

3 R. J. Leatherbarrow, *GraFit* version 4.0, Erithacus Software Ltd, Staines, UK.
